# Supplementary material for: Dupilumab efficacy and safety in patients with moderate to severe asthma: A systematic review and meta-analysis
Source: PubMed Central journal article supplement (PMC9574251; doi:10.3389/fphar.2022.992731), 2022-10-03

**Supplementary Figure1:** A forest plot of the change in FENO (ppb) at week 12.

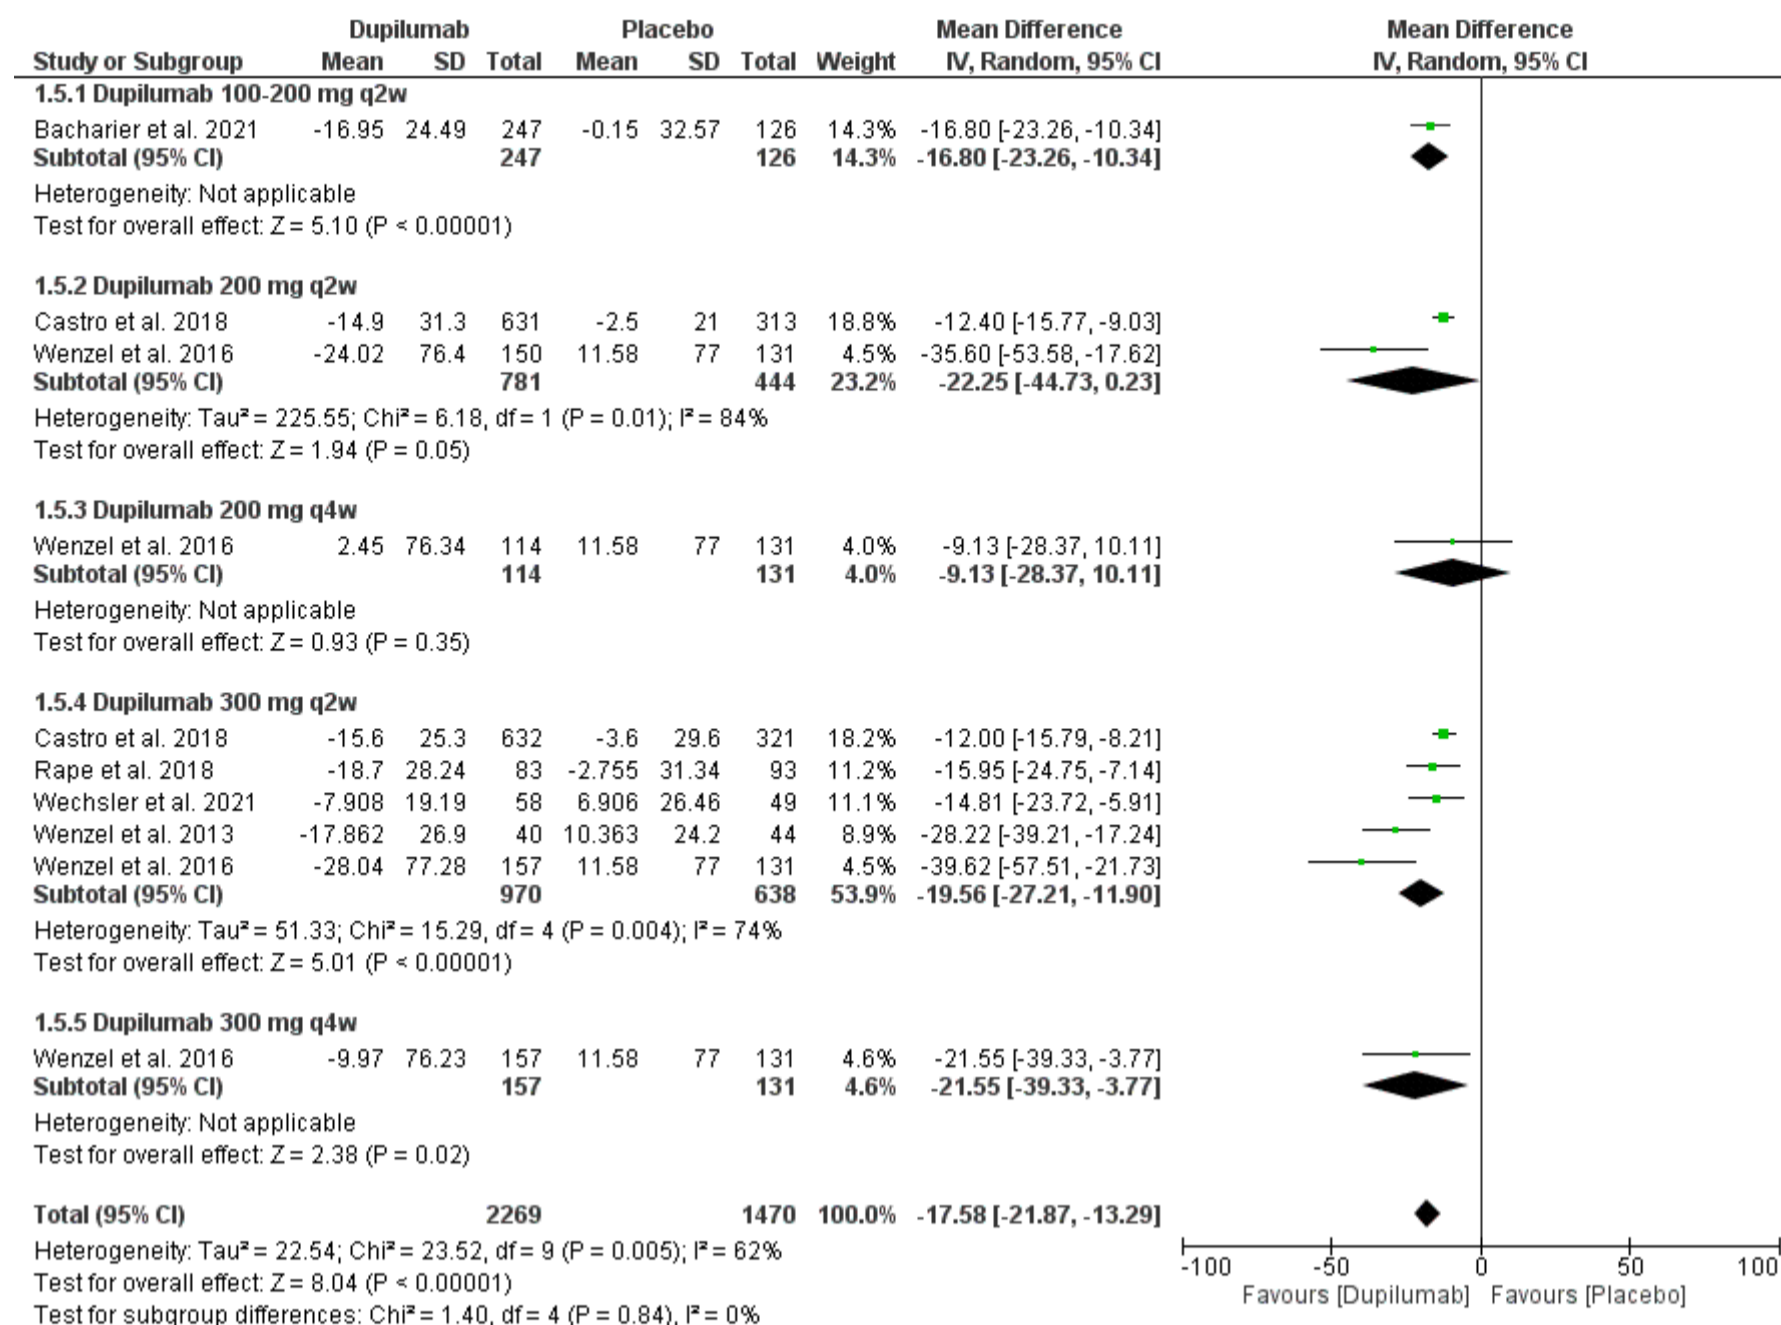

**Supplementary Figures 2A:** A forest plot of the change in FENO (ppb) at week 24.

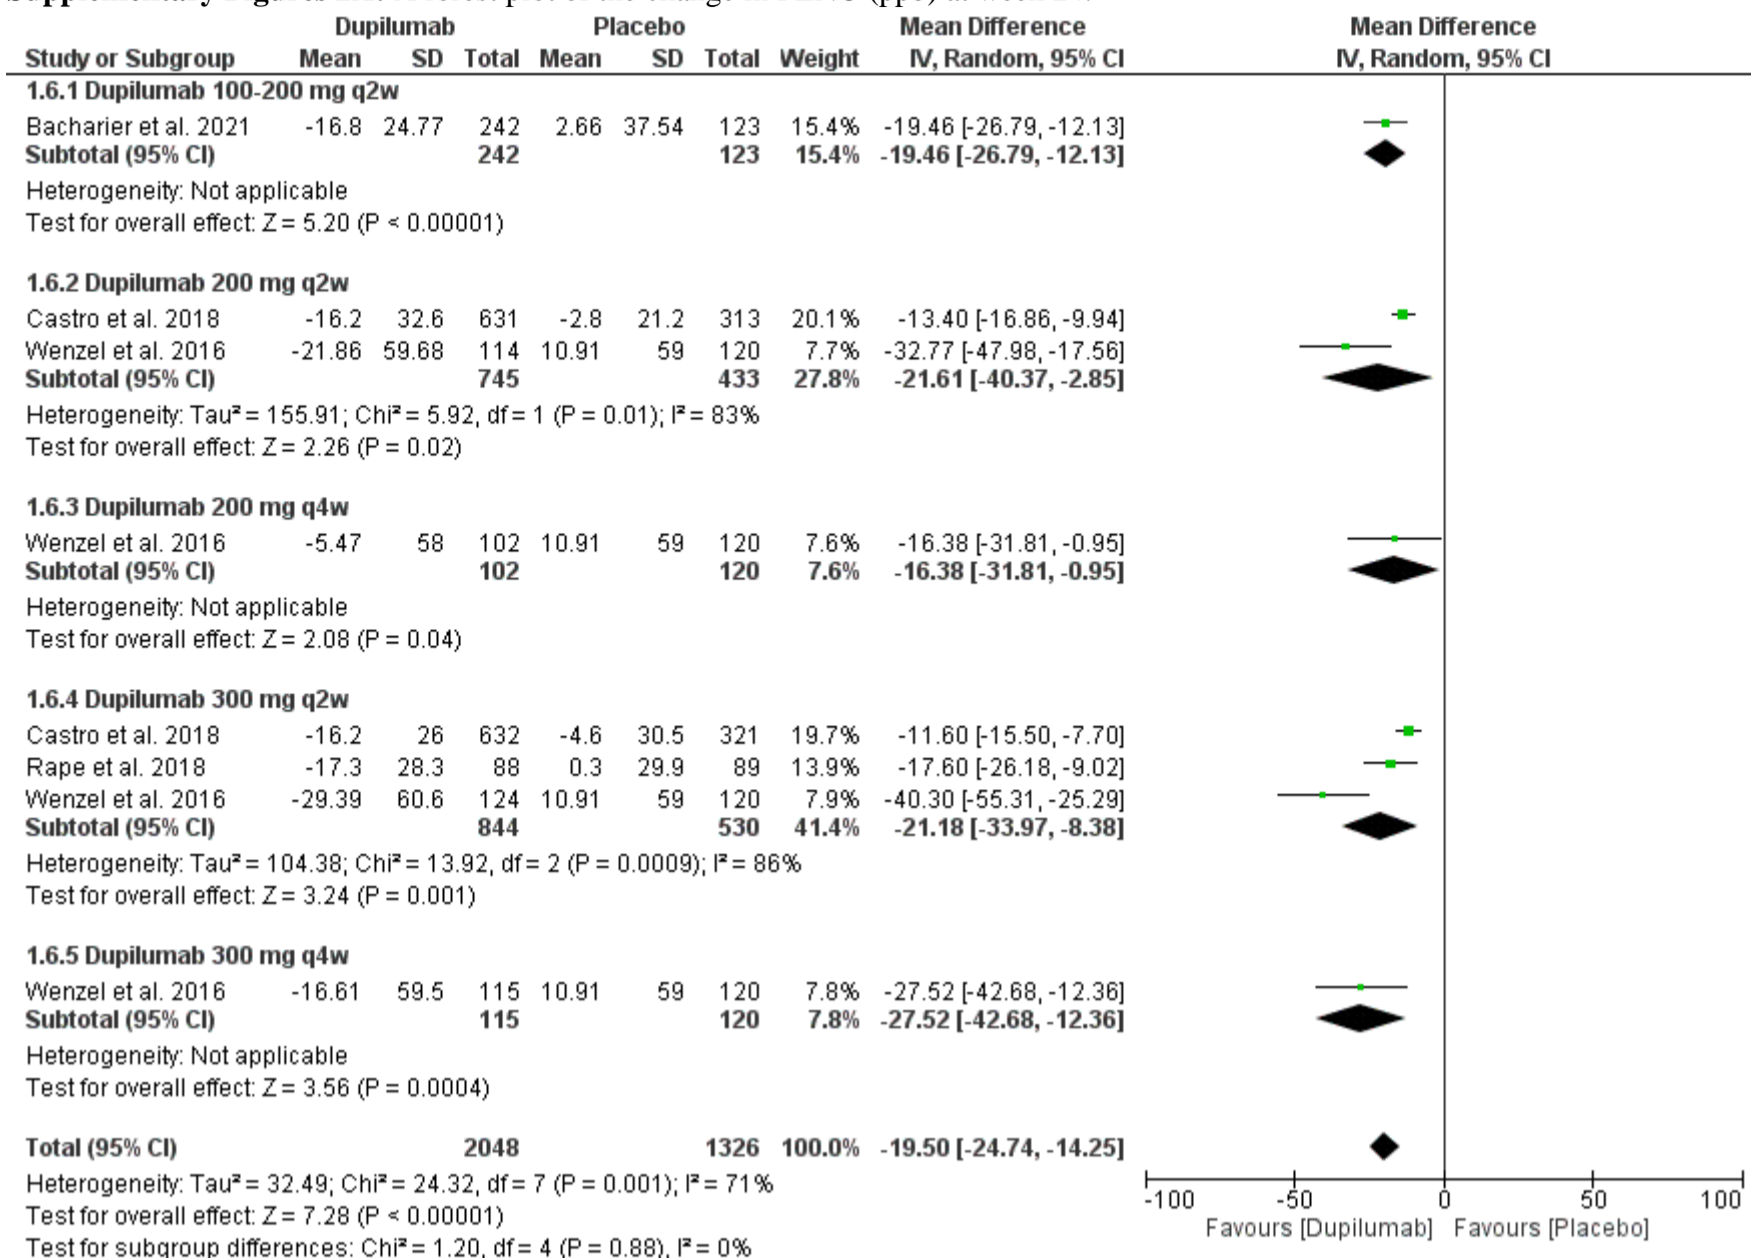

**Supplementary Figures 2B:** A forest plot of the change in FENO (ppb) at week 24 after sensitivity analysis.

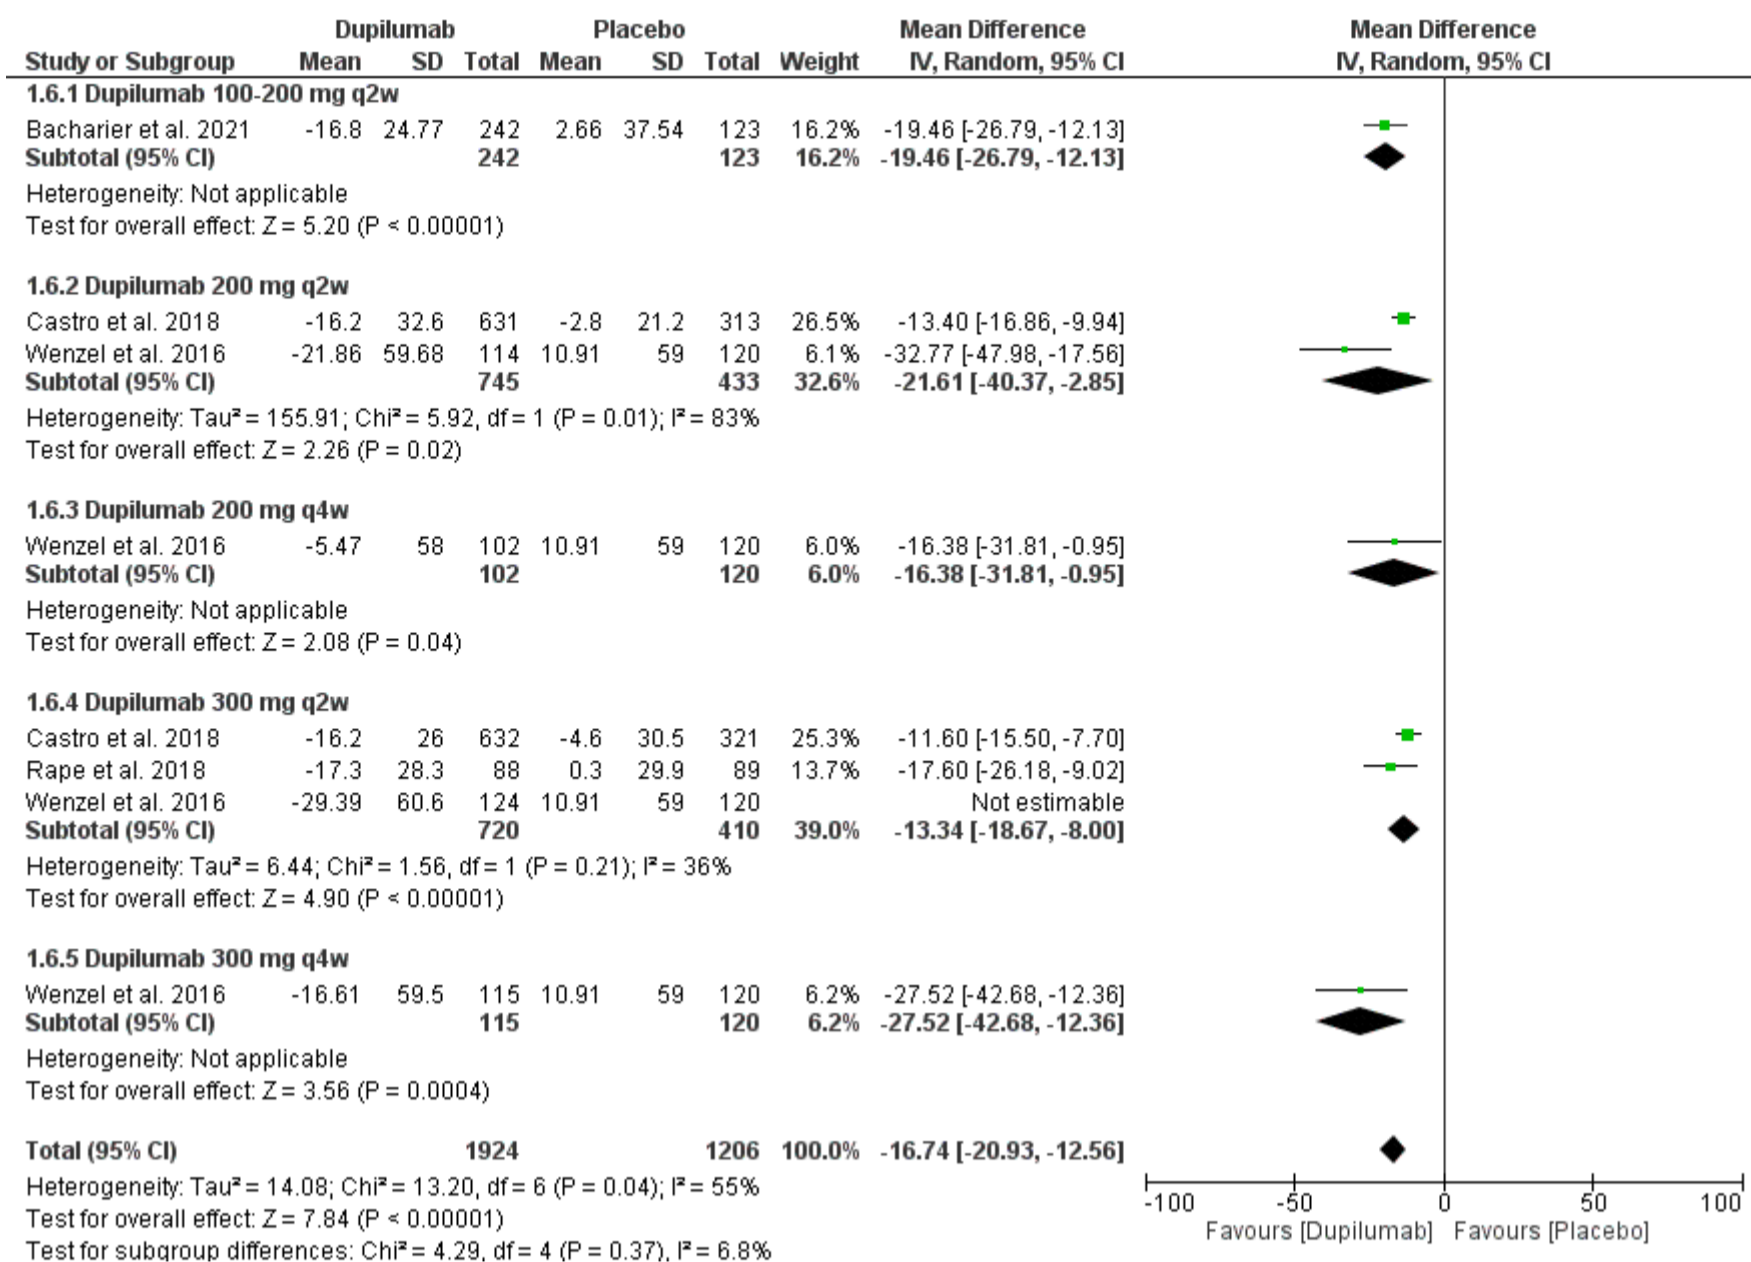

**Supplementary Figure 3:** A forest plot of the change in blood eosinophils (cells/mm<sup>3</sup>) at week 12.

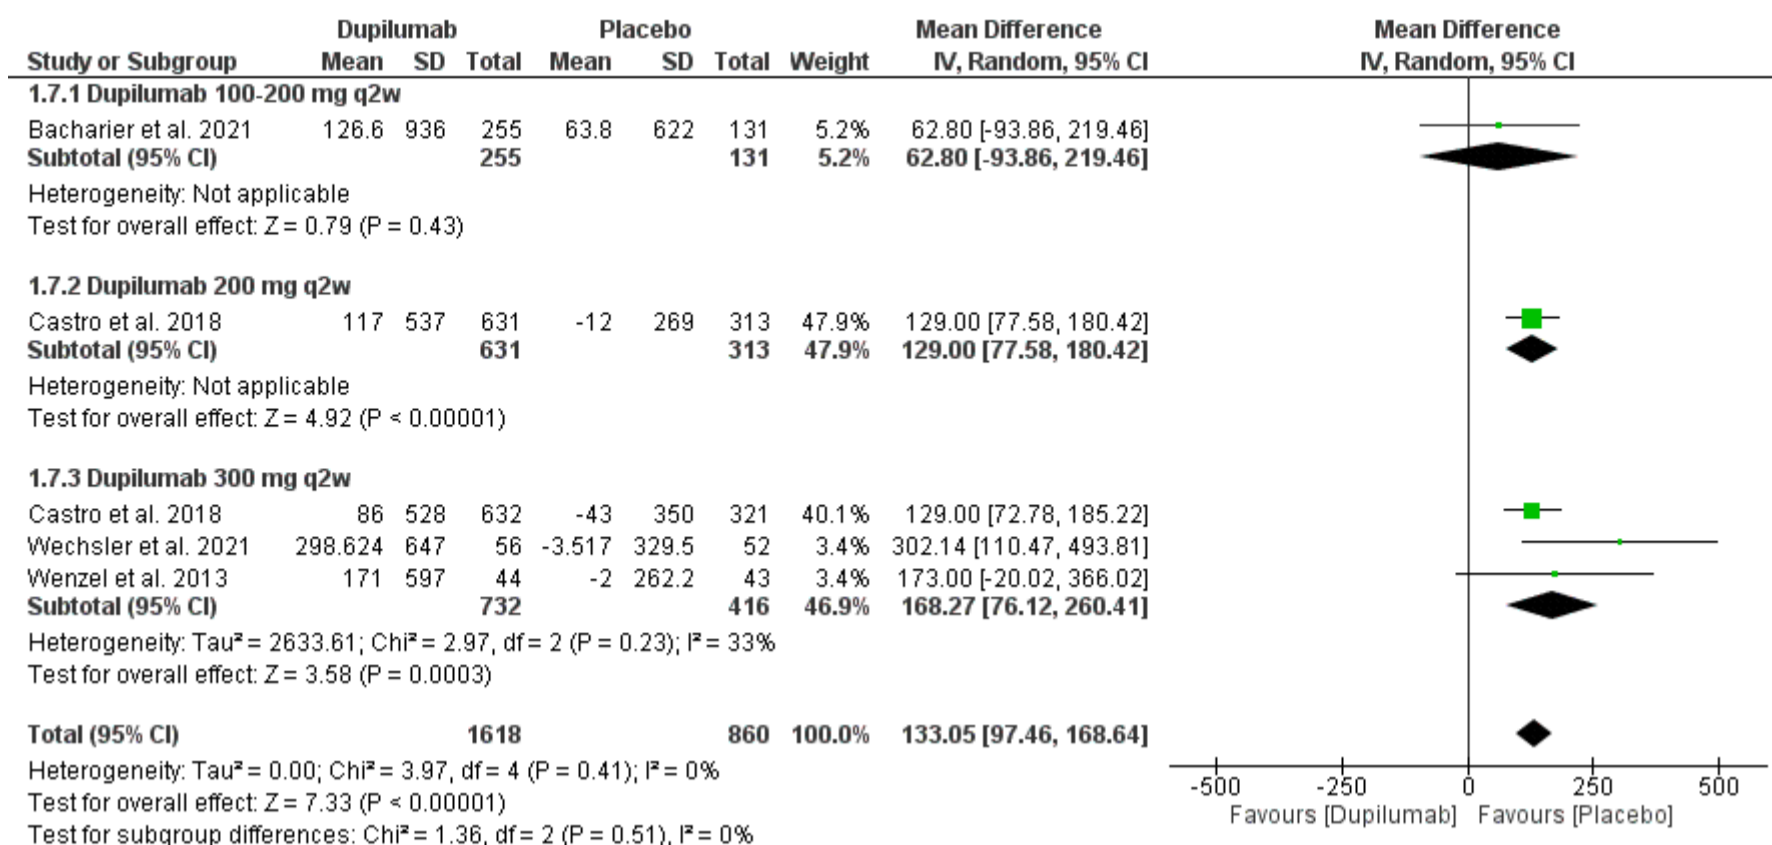

**Supplementary Figure 4:** A forest plot of the change in blood eosinophils (cells/mm<sup>3</sup>) at week 24.

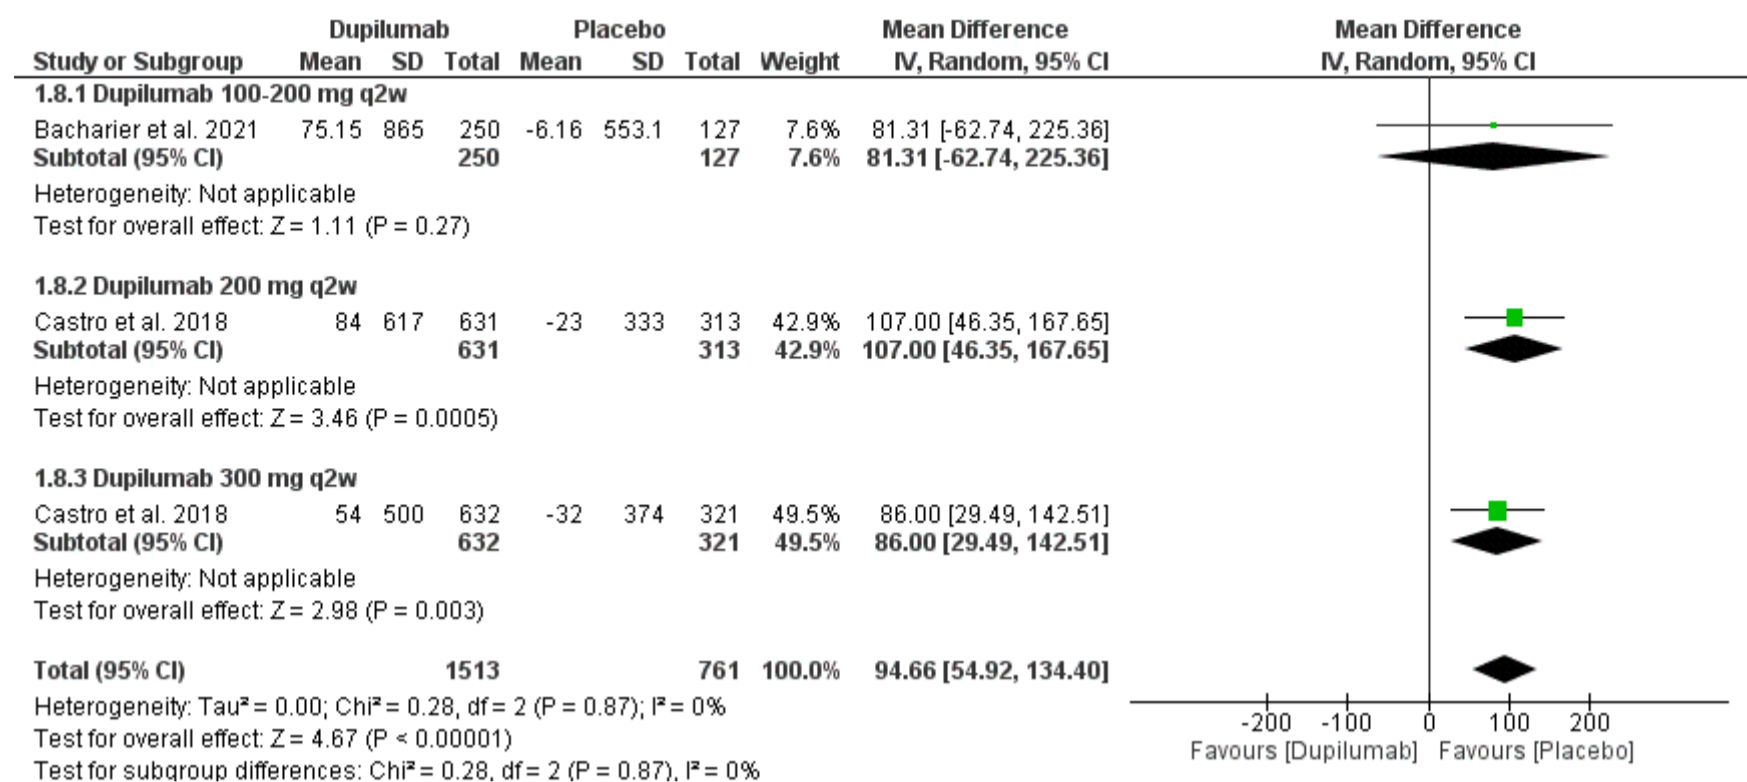

**Supplementary Figure 5:** A forest plot of the change in IgE (IU/mL) at week 12.

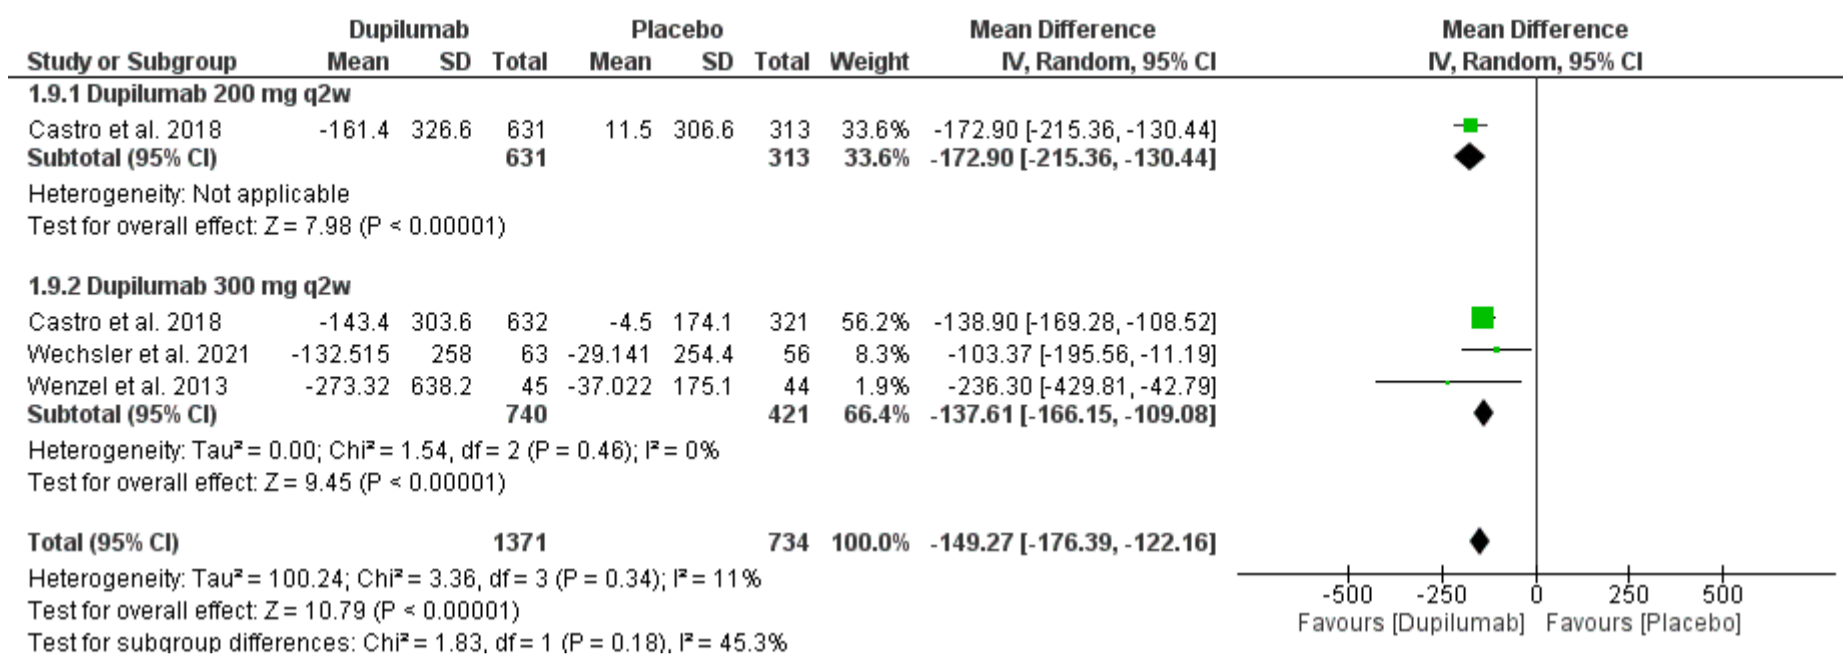

**Supplementary Figure 6:** A forest plot of the change in IgE (IU/mL) at week 24.

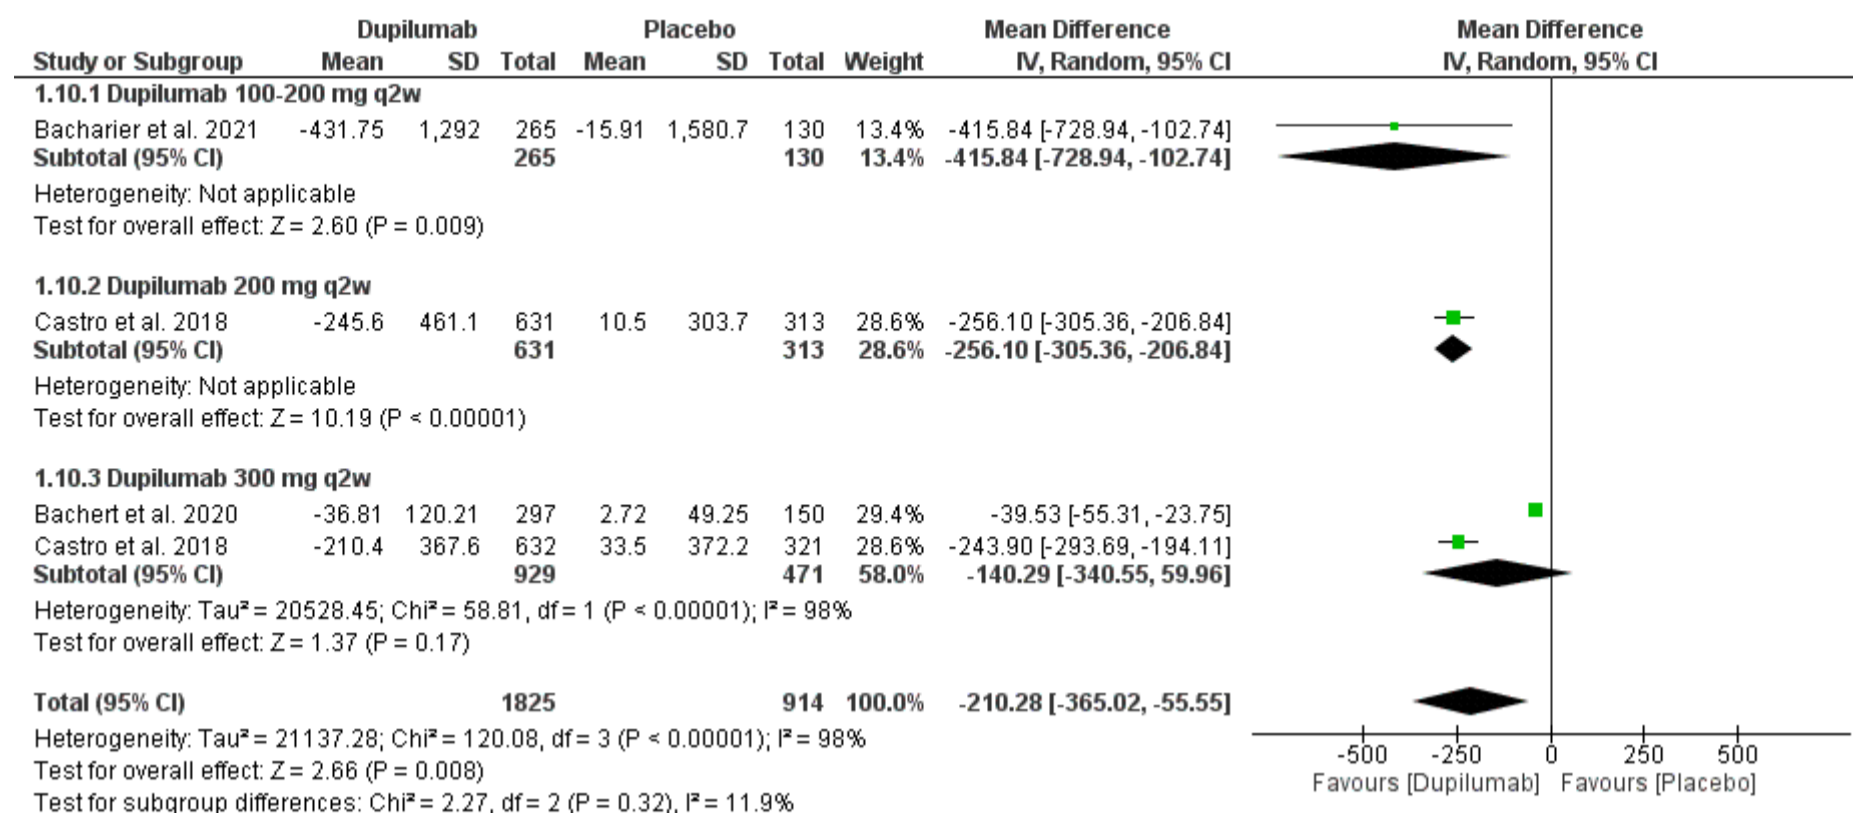

**Supplementary Figure 7:** A forest plot of any and treatment-emergent adverse events.

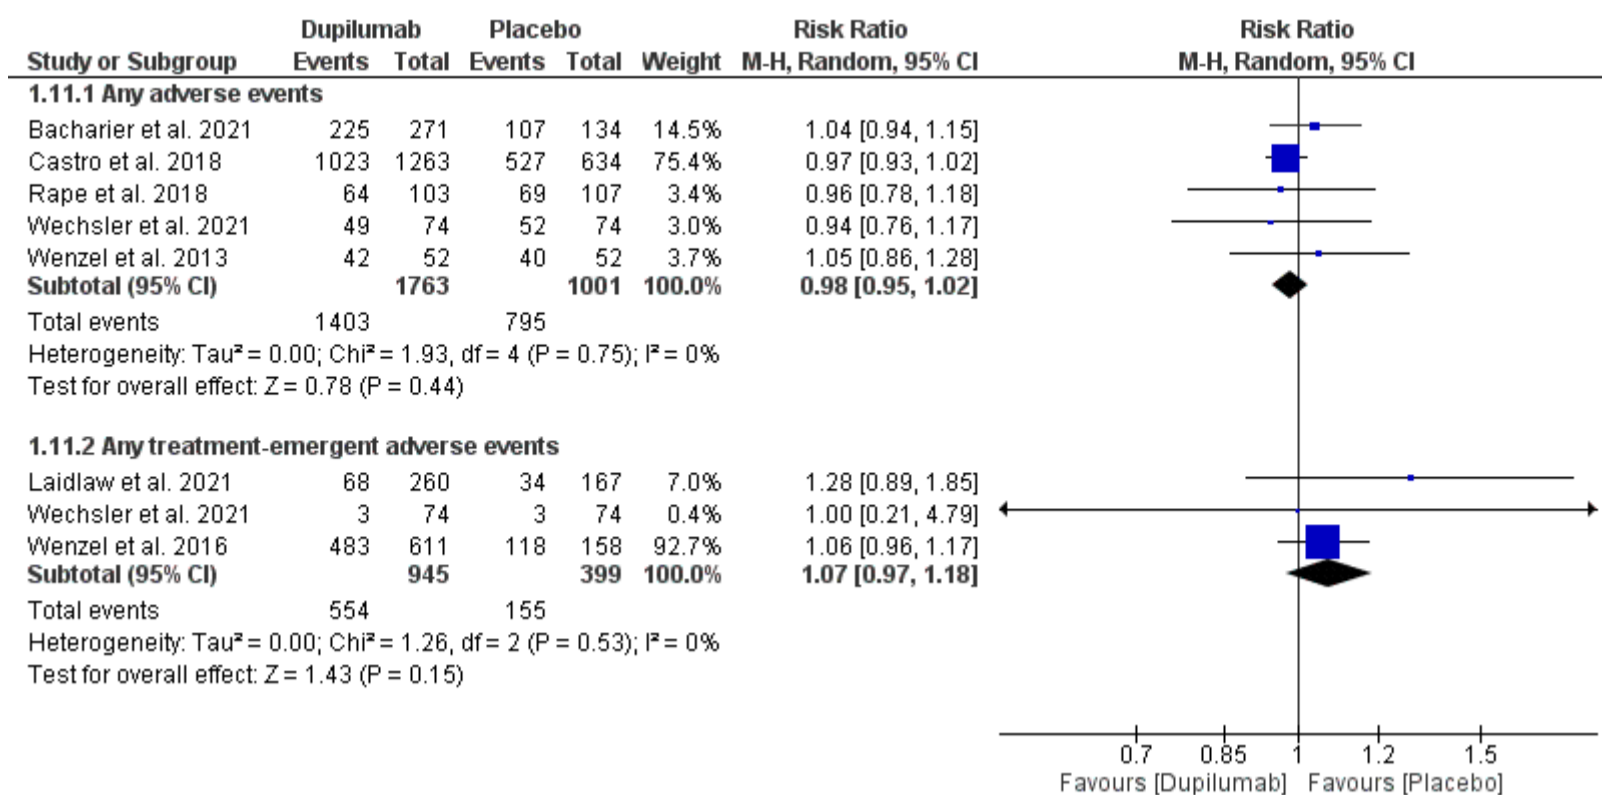



**Supplementary Figure 8:** A forest plot of any and treatment-emergent adverse events leading to permanent discontinuation.

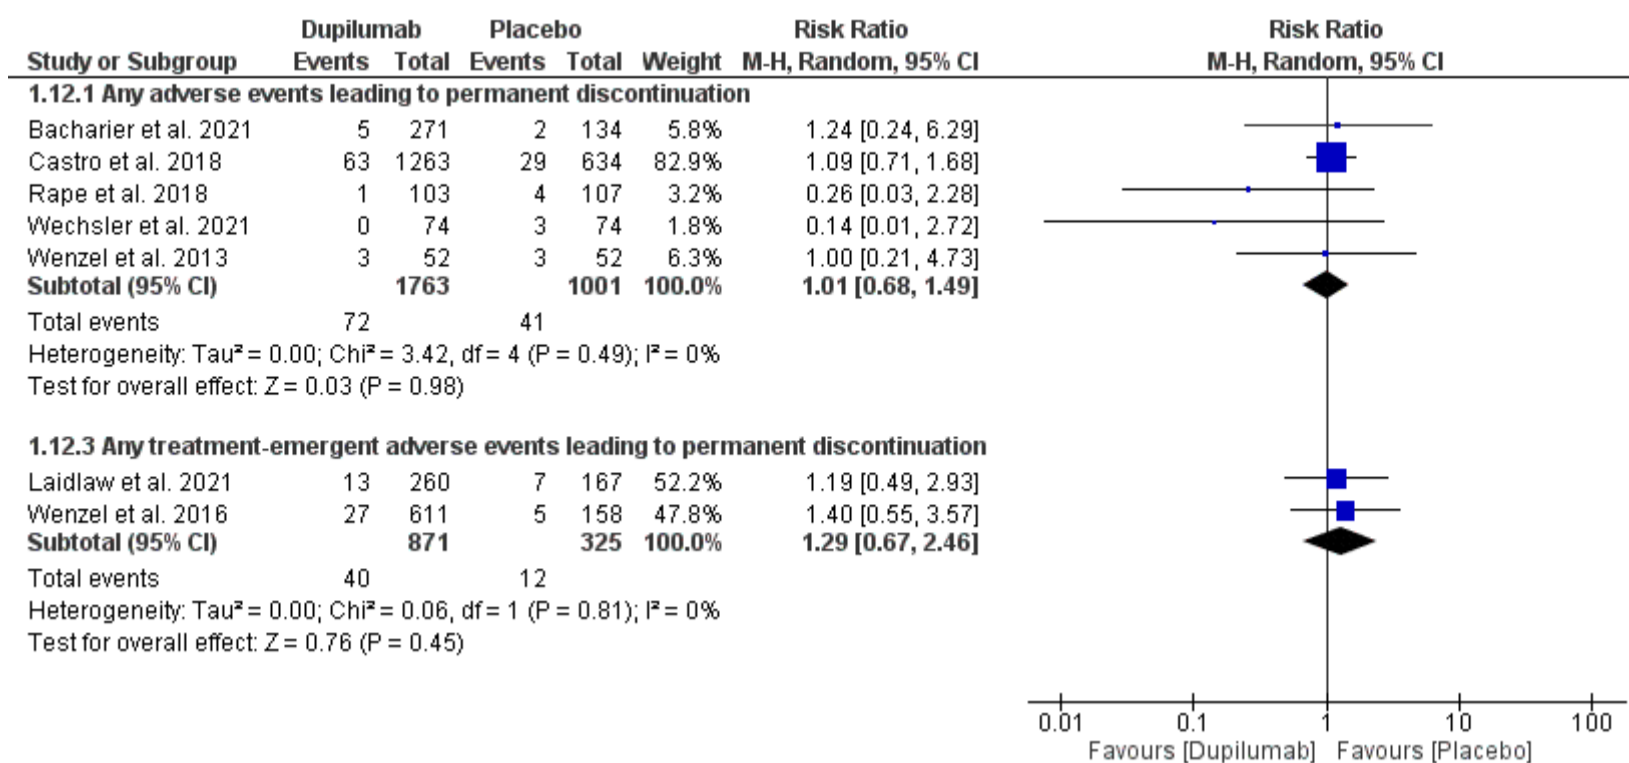

**Supplementary Figure 9:** A forest plot of serious and treatment-emergent adverse events.

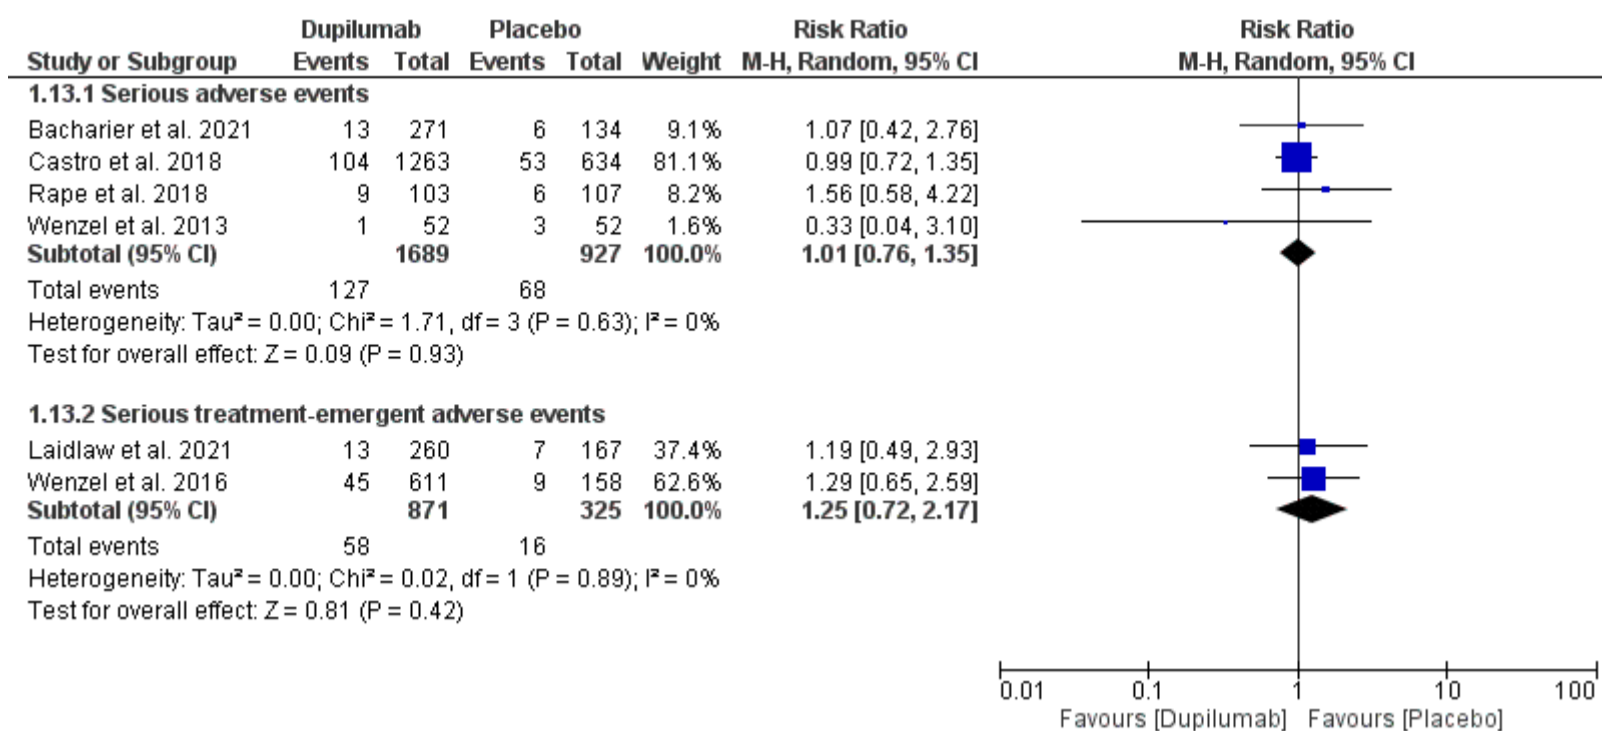

**Supplementary Figure 10:** A forest plot of any adverse events leading to death and any treatment-emergent adverse events leading to death.

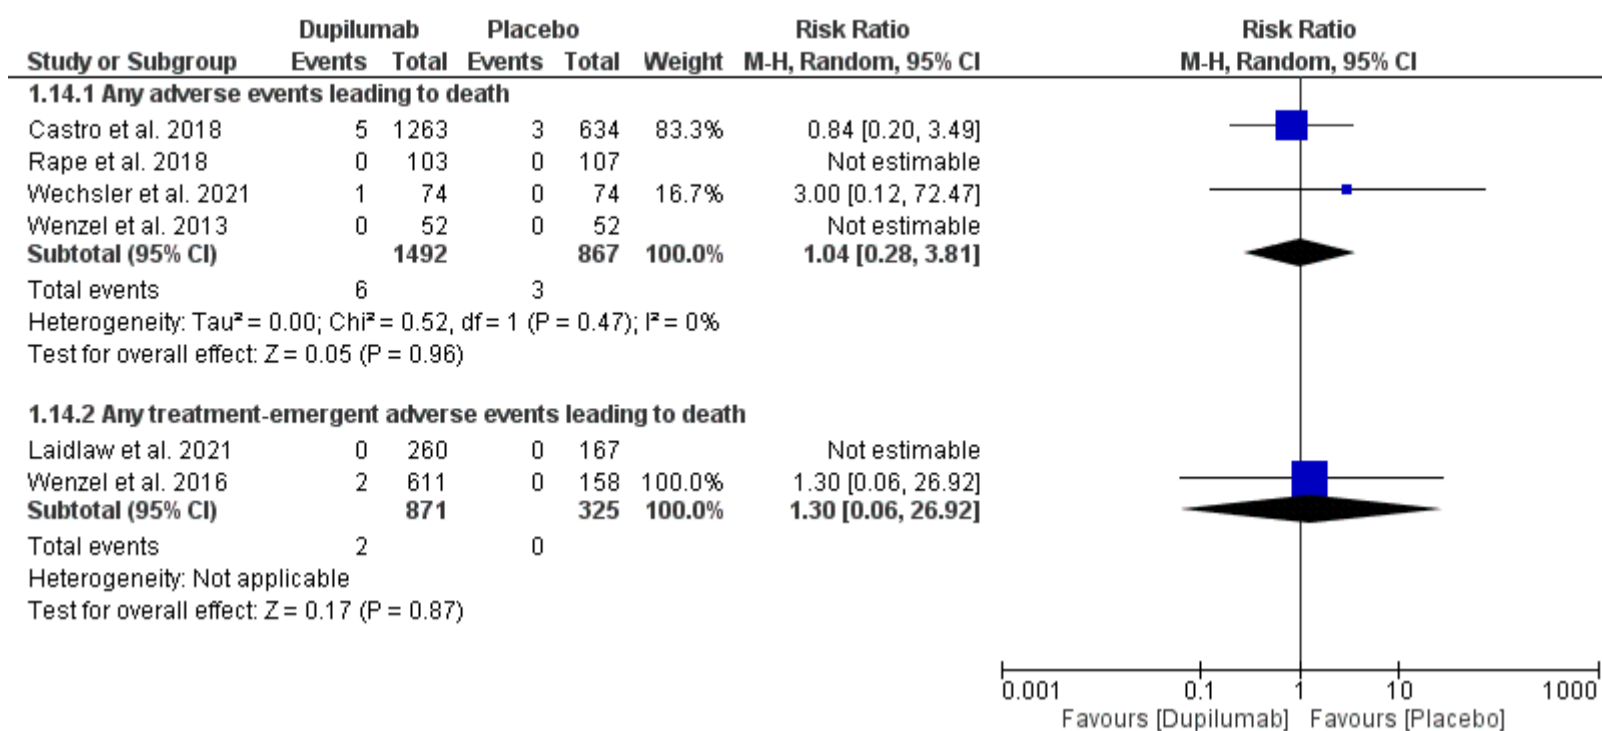

**Supplementary Figure 11:** A forest plot of upper respiratory tract infection, viral upper respiratory tract infection, and influenza adverse events.

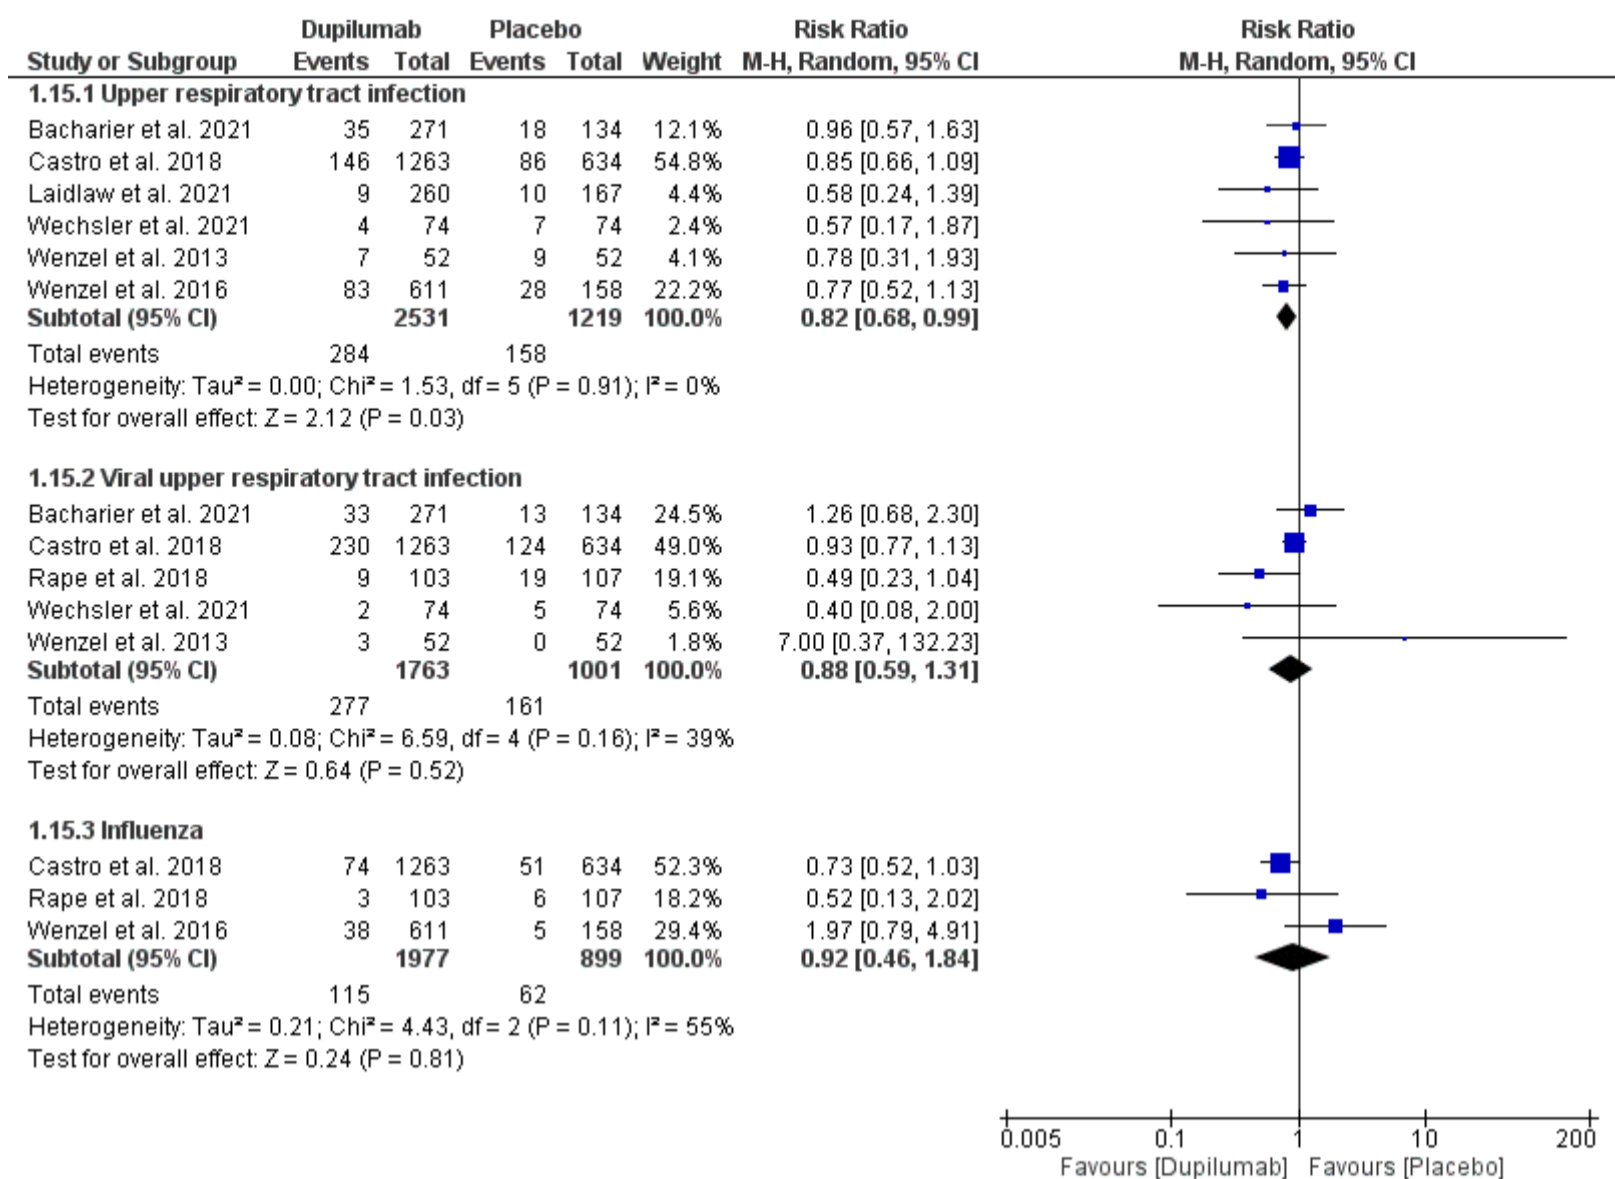

**Supplementary Figure 12:** A forest plot of nasopharyngitis, sinusitis, and bronchitis adverse events.

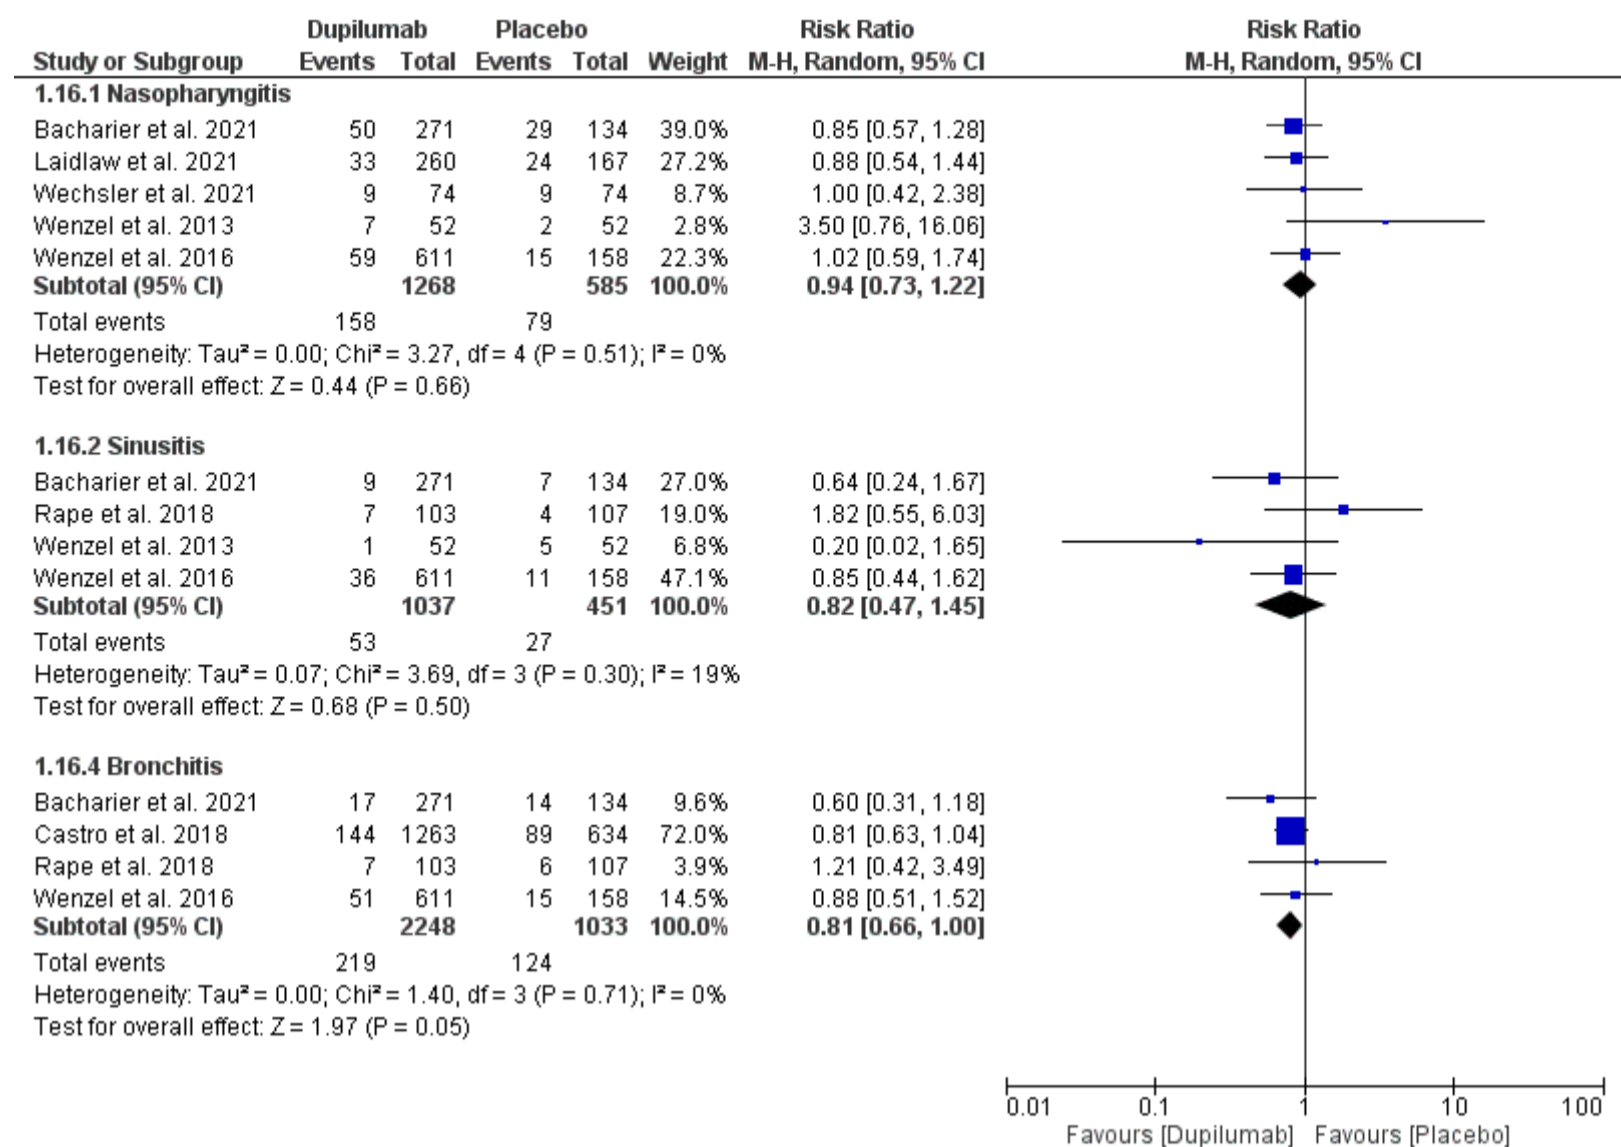

**Supplementary Figure 13:** A forest plot of injection site reaction, eosinophilia, and headache adverse events.

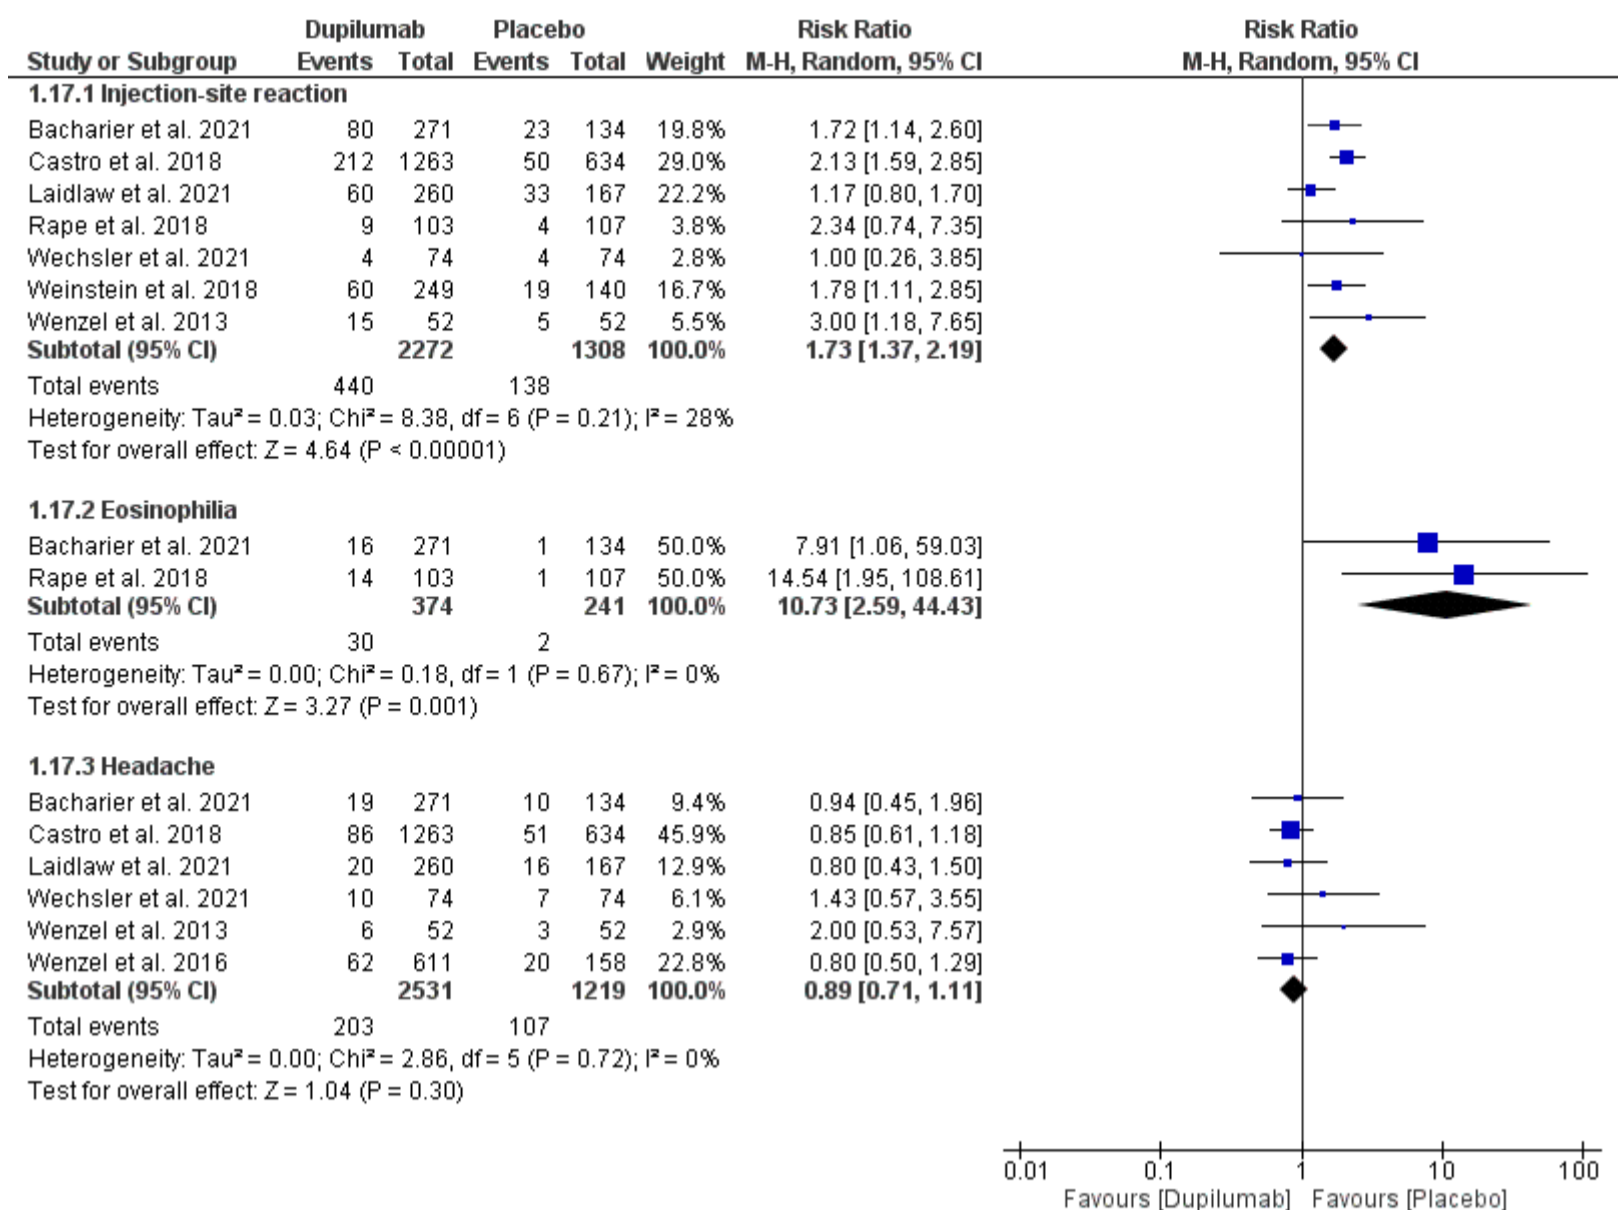

**Supplementary Figure 14:** A forest plot of allergic rhinitis, cough, urinary tract infection, back pain, and erythema adverse events.

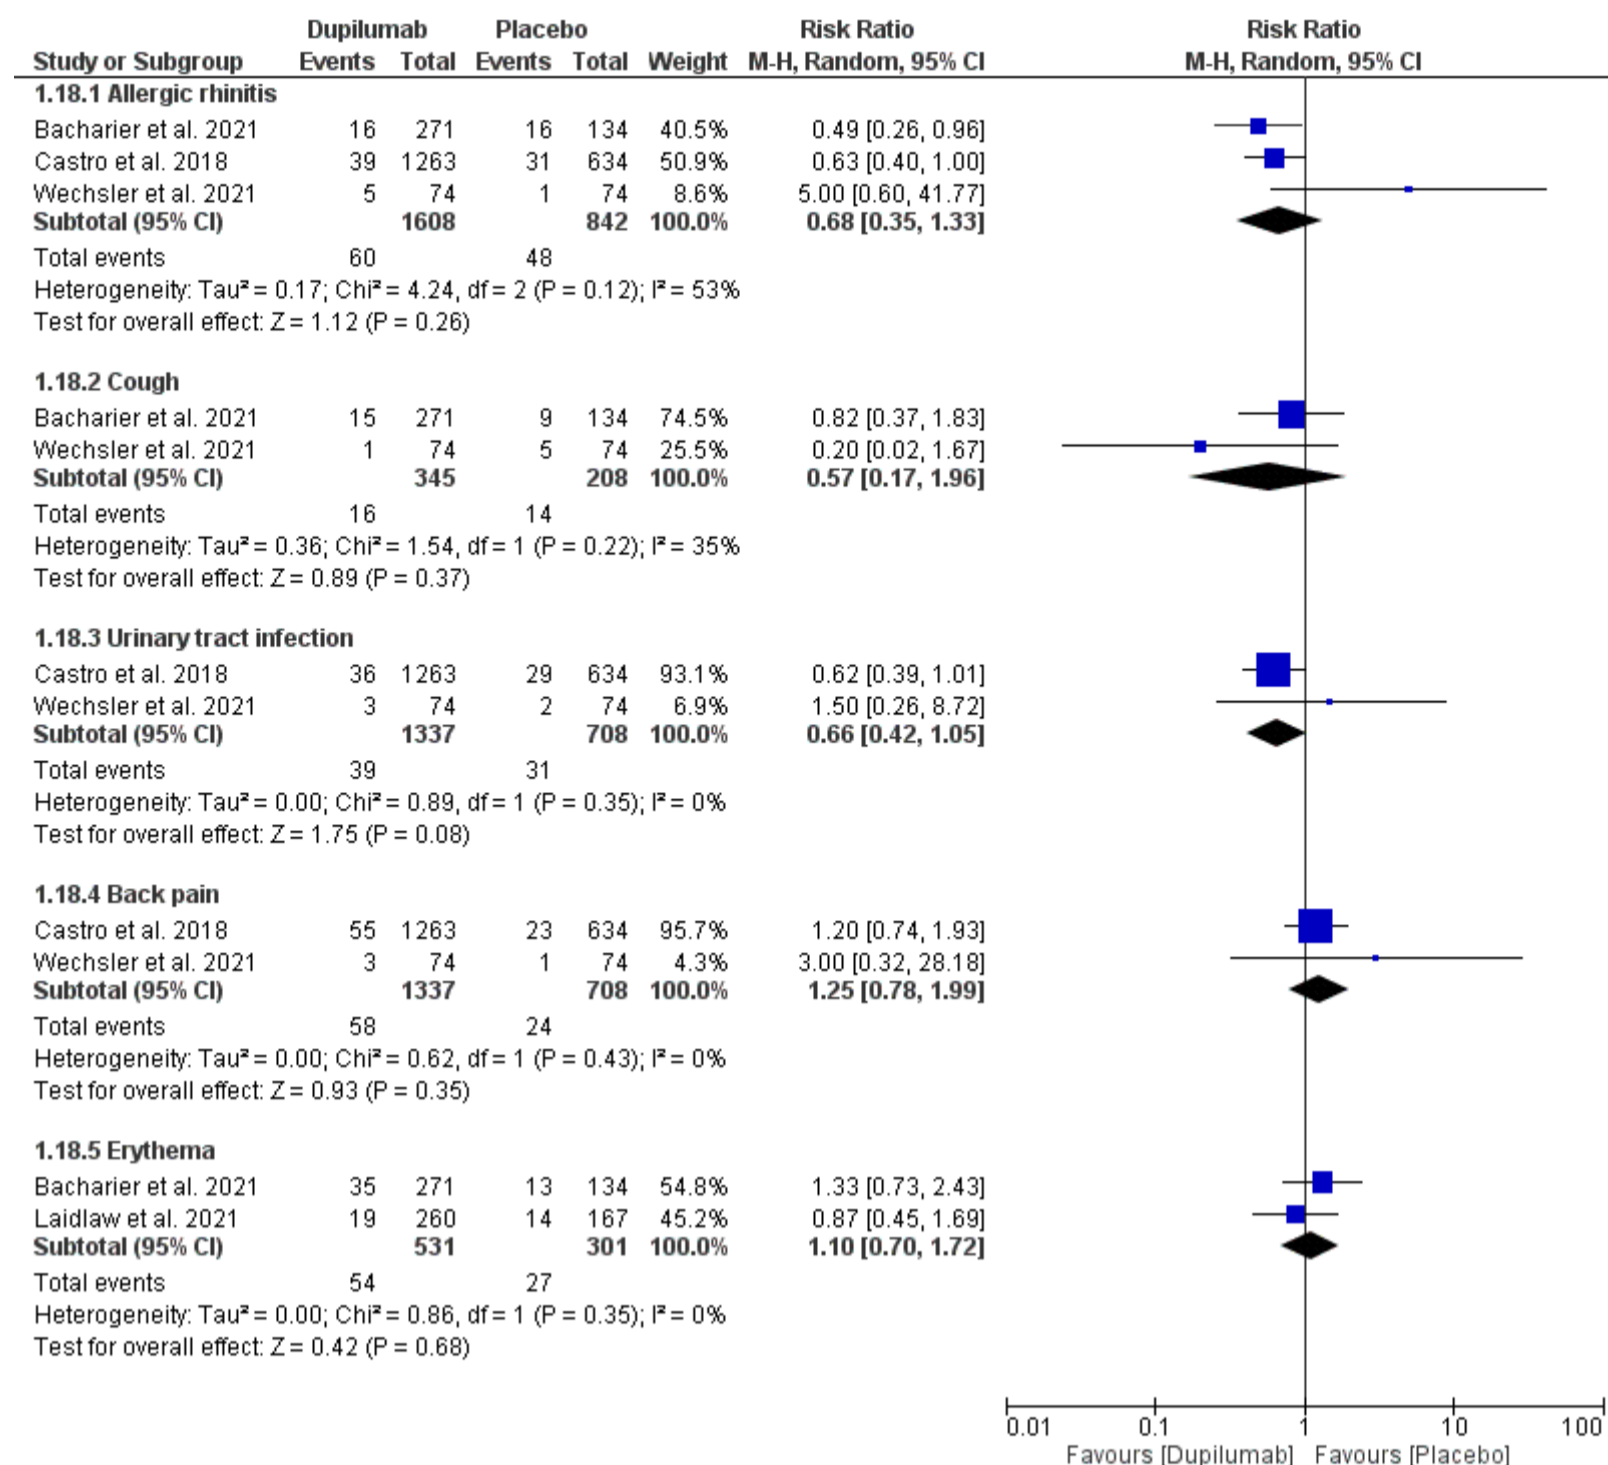

Supplement: Presentation1.pdf [file Presentation1.pdf]
